# Supplementary material for: From Young to Older, the 4 Phases Method Is Efficient in Promoting Quick Weight, BMI, and Waist Circumference Reductions
Source: MDPI journal article supplement (doi:10.3390/healthcare10081398), 2022-07-27
Supplement: s1 [file s1]

Supplementary Material: Participant's data - weight, BMI, and waist circumference reductions (%) after 5 weeks of 4 Phases Methodology.

| SEX | AGE   | WEIGHT<br>BASELINE<br>(KG) | WEIGHT<br>POST<br>(KG) | WEIGHT<br>LOSS<br>(KG) | WEIGHT<br>LOSS<br>(%) | HEIGHT<br>(M) | BMI<br>BASELINE | BMI<br>POST | BMI<br>REDUCTION | BMI<br>REDUCTION<br>(%) | WC<br>BASELINE<br>(CM) | WC<br>POST<br>(CM) | WC<br>REDUCTION<br>(CM) | WC REDUCTION<br>(%) |
|-----|-------|----------------------------|------------------------|------------------------|-----------------------|---------------|-----------------|-------------|------------------|-------------------------|------------------------|--------------------|-------------------------|---------------------|
| F   | 46,00 | 71,00                      | 60,00                  | -11,00                 | -15,49%               | 1,65          | 26,08           | 22,04       | -4,04            | -15,49%                 | 90,00                  | 81,00              | -9,00                   | -10,00%             |
| F   | 46,00 | 78,00                      | 71,00                  | -7,00                  | -8,97%                | 1,62          | 29,72           | 27,05       | -2,67            | -8,97%                  | 97,00                  | 91,00              | -6,00                   | -6,19%              |
| F   | 34,00 | 79,90                      | 71,30                  | -8,60                  | -10,76%               | 1,59          | 31,60           | 28,20       | -3,40            | -10,76%                 | 85,00                  | 79,00              | -6,00                   | -7,06%              |
| F   | 62,00 | 90,70                      | 83,70                  | -7,00                  | -7,72%                | 1,63          | 34,14           | 31,50       | -2,63            | -7,72%                  | 109,00                 | 103,00             | -6,00                   | -5,50%              |
| F   | 52,00 | 88,50                      | 81,90                  | -6,60                  | -7,46%                | 1,53          | 37,81           | 34,99       | -2,82            | -7,46%                  | 109,00                 | 102,00             | -7,00                   | -6,42%              |
| F   | 25,00 | 90,40                      | 84,00                  | -6,40                  | -7,08%                | 1,60          | 35,31           | 32,81       | -2,50            | -7,08%                  | 107,00                 | 101,00             | -6,00                   | -5,61%              |
| F   | 36,00 | 68,90                      | 62,70                  | -6,20                  | -9,00%                | 1,61          | 26,58           | 24,19       | -2,39            | -9,00%                  | 80,00                  | 74,00              | -6,00                   | -7,50%              |
| F   | 33,00 | 98,00                      | 91,90                  | -6,10                  | -6,22%                | 1,70          | 33,91           | 31,80       | -2,11            | -6,22%                  | 96,00                  | 92,00              | -4,00                   | -4,17%              |
| F   | 42,00 | 85,40                      | 79,70                  | -5,70                  | -6,67%                | 1,63          | 32,14           | 30,00       | -2,15            | -6,67%                  | 104,00                 | 97,00              | -7,00                   | -6,73%              |

| SEX | AGE   | WEIGHT<br>BASELINE<br>(KG) | WEIGHT<br>POST<br>(KG) | WEIGHT<br>LOSS<br>(KG) | WEIGHT<br>LOSS<br>( % ) | HEIGHT<br>(M) | BMI<br>BASELINE | BMI<br>POST | BMI<br>REDUCTION | BMI<br>REDUCTION<br>( % ) | WC<br>BASELINE<br>(CM) | WC<br>POST<br>(CM) | WC<br>REDUCTION<br>(CM) | WC REDUCTION<br>(%) |
|-----|-------|----------------------------|------------------------|------------------------|-------------------------|---------------|-----------------|-------------|------------------|---------------------------|------------------------|--------------------|-------------------------|---------------------|
| F   | 41,00 | 78,10                      | 72,80                  | -5,30                  | -6,79%                  | 1,65          | 28,69           | 26,74       | -1,95            | -6,79%                    | 93,00                  | 89,00              | -4,00                   | -4,30%              |
| F   | 41,00 | 68,60                      | 63,00                  | -5,60                  | -8,16%                  | 1,51          | 30,09           | 27,63       | -2,46            | -8,16%                    | 87,00                  | 80,00              | -7,00                   | -8,05%              |
| F   | 22,00 | 77,30                      | 72,30                  | -5,00                  | -6,47%                  | 1,64          | 28,74           | 26,88       | -1,86            | -6,47%                    | 95,00                  | 85,00              | -10,00                  | -10,53%             |
| F   | 23,00 | 70,70                      | 68,50                  | -2,20                  | -3,11%                  | 1,55          | 29,43           | 28,51       | -0,92            | -3,11%                    | 92,00                  | 92,00              | 0,00                    | 0,00%               |
| F   | 28,00 | 66,10                      | 64,80                  | -1,30                  | -1,97%                  | 1,62          | 25,19           | 24,69       | -0,50            | -1,97%                    | 86,00                  | 83,00              | -3,00                   | -3,49%              |
| F   | 36,00 | 89,00                      | 86,00                  | -3,00                  | -3,37%                  | 1,58          | 35,65           | 34,45       | -1,20            | -3,37%                    | 104,00                 | 98,00              | -6,00                   | -5,77%              |
| F   | 44,00 | 105,40                     | 101,30                 | -4,10                  | -3,89%                  | 1,65          | 38,71           | 37,21       | -1,51            | -3,89%                    | 117,00                 | 107,00             | -10,00                  | -8,55%              |
| F   | 38,00 | 116,30                     | 110,50                 | -5,80                  | -4,99%                  | 1,78          | 36,71           | 34,88       | -1,83            | -4,99%                    | 119,00                 | 116,00             | -3,00                   | -2,52%              |
| F   | 39,00 | 82,40                      | 76,10                  | -6,30                  | -7,65%                  | 1,50          | 36,62           | 33,82       | -2,80            | -7,65%                    | 96,00                  | 93,00              | -3,00                   | -3,13%              |
| F   | 46,00 | 87,00                      | 73,80                  | -13,20                 | -15,17%                 | 1,60          | 33,98           | 28,83       | -5,16            | -15,17%                   | 103,00                 | 83,00              | -20,00                  | -19,42%             |
| F   | 50,00 | 68,50                      | 60,00                  | -8,50                  | -12,41%                 | 1,53          | 29,26           | 25,63       | -3,63            | -12,41%                   | 83,00                  | 77,00              | -6,00                   | -7,23%              |
| F   | 39,00 | 121,30                     | 114,20                 | -7,10                  | -5,85%                  | 1,80          | 37,44           | 35,25       | -2,19            | -5,85%                    | 119,00                 | 111,00             | -8,00                   | -6,72%              |
| F   | 59,00 | 103,40                     | 96,40                  | -7,00                  | -6,77%                  | 1,56          | 42,49           | 39,61       | -2,88            | -6,77%                    | 107,00                 | 97,00              | -10,00                  | -9,35%              |
| F   | 67,00 | 106,70                     | 99,20                  | -7,50                  | -7,03%                  | 1,62          | 40,66           | 37,80       | -2,86            | -7,03%                    | 107,00                 | 93,00              | -14,00                  | -13,08%             |
| F   | 51,00 | 82,50                      | 75,50                  | -7,00                  | -8,48%                  | 1,64          | 30,67           | 28,07       | -2,60            | -8,48%                    | 98,00                  | 93,00              | -5,00                   | -5,10%              |
| F   | 43,00 | 120,00                     | 109,70                 | -10,30                 | -8,58%                  | 1,60          | 46,88           | 42,85       | -4,02            | -8,58%                    | 112,00                 | 100,00             | -12,00                  | -10,71%             |
| F   | 28,00 | 96,60                      | 87,90                  | -8,70                  | -9,01%                  | 1,59          | 38,21           | 34,77       | -3,44            | -9,01%                    | 108,00                 | 101,00             | -7,00                   | -6,48%              |

|   |       |        |        |        |         |      |       |       |       |         |        |        |        |         |
|---|-------|--------|--------|--------|---------|------|-------|-------|-------|---------|--------|--------|--------|---------|
| F | 18,00 | 129,00 | 120,70 | -8,30  | -6,43%  | 1,69 | 45,17 | 42,26 | -2,91 | -6,43%  | 124,00 | 118,00 | -6,00  | -4,84%  |
| F | 54,00 | 124,70 | 109,10 | -15,60 | -12,51% | 1,58 | 49,95 | 43,70 | -6,25 | -12,51% | 124,00 | 114,00 | -10,00 | -8,06%  |
| F | 29,00 | 86,50  | 76,00  | -10,50 | -12,14% | 1,62 | 32,96 | 28,96 | -4,00 | -12,14% | 92,00  | 84,00  | -8,00  | -8,70%  |
| F | 35,00 | 95,30  | 85,90  | -9,40  | -9,86%  | 1,66 | 34,58 | 31,17 | -3,41 | -9,86%  | 105,00 | 96,00  | -9,00  | -8,57%  |
| F | 40,00 | 65,10  | 58,30  | -6,80  | -10,45% | 1,54 | 27,45 | 24,58 | -2,87 | -10,45% | 95,00  | 88,00  | -7,00  | -7,37%  |
| F | 41,00 | 113,50 | 106,90 | -6,60  | -5,81%  | 1,55 | 47,24 | 44,50 | -2,75 | -5,81%  | 114,00 | 109,00 | -5,00  | -4,39%  |
| F | 34,00 | 72,10  | 66,80  | -5,30  | -7,35%  | 1,67 | 25,85 | 23,95 | -1,90 | -7,35%  | 87,00  | 81,00  | -6,00  | -6,90%  |
| F | 50,00 | 114,70 | 104,20 | -10,50 | -9,15%  | 1,65 | 42,13 | 38,27 | -3,86 | -9,15%  | 111,00 | 103,00 | -8,00  | -7,21%  |
| F | 47,00 | 100,20 | 94,60  | -5,60  | -5,59%  | 1,70 | 34,67 | 32,73 | -1,94 | -5,59%  | 117,00 | 110,00 | -7,00  | -5,98%  |
| F | 37,00 | 91,70  | 83,70  | -8,00  | -8,72%  | 1,65 | 33,68 | 30,74 | -2,94 | -8,72%  | 95,00  | 86,00  | -9,00  | -9,47%  |
| F | 40,00 | 114,50 | 107,20 | -7,30  | -6,38%  | 1,68 | 40,57 | 37,98 | -2,59 | -6,38%  | 118,00 | 111,00 | -7,00  | -5,93%  |
| F | 64,00 | 119,20 | 110,90 | -8,30  | -6,96%  | 1,55 | 49,61 | 46,16 | -3,45 | -6,96%  | 117,00 | 108,00 | -9,00  | -7,69%  |
| F | 50,00 | 79,80  | 73,10  | -6,70  | -8,40%  | 1,62 | 30,41 | 27,85 | -2,55 | -8,40%  | 97,00  | 85,00  | -12,00 | -12,37% |
| F | 22,00 | 82,50  | 75,00  | -7,50  | -9,09%  | 1,61 | 31,83 | 28,93 | -2,89 | -9,09%  | 85,00  | 79,00  | -6,00  | -7,06%  |
| F | 41,00 | 87,70  | 81,30  | -6,40  | -7,30%  | 1,59 | 34,69 | 32,16 | -2,53 | -7,30%  | 102,00 | 96,00  | -6,00  | -5,88%  |
| F | 40,00 | 106,10 | 96,80  | -9,30  | -8,77%  | 1,69 | 37,15 | 33,89 | -3,26 | -8,77%  | 103,00 | 95,50  | -7,50  | -7,28%  |

|   |           |        |        |        |         |      |       |       |       |         |        |        |        |         |
|---|-----------|--------|--------|--------|---------|------|-------|-------|-------|---------|--------|--------|--------|---------|
| F | 51,0<br>0 | 89,00  | 87,70  | -1,30  | -1,46%  | 1,59 | 35,20 | 34,69 | -0,51 | -1,46%  | 113,00 | 105,00 | -8,00  | -7,08%  |
| F | 27,0<br>0 | 84,60  | 76,80  | -7,80  | -9,22%  | 1,56 | 34,76 | 31,56 | -3,21 | -9,22%  | 105,00 | 96,00  | -9,00  | -8,57%  |
| F | 27,0<br>0 | 88,20  | 82,10  | -6,10  | -6,92%  | 1,59 | 34,89 | 32,47 | -2,41 | -6,92%  | 97,00  | 93,00  | -4,00  | -4,12%  |
| F | 40,0<br>0 | 82,00  | 71,70  | -10,30 | -12,56% | 1,53 | 35,03 | 30,63 | -4,40 | -12,56% | 105,00 | 97,50  | -7,50  | -7,14%  |
| F | 34,0<br>0 | 92,60  | 85,50  | -7,10  | -7,67%  | 1,56 | 38,05 | 35,13 | -2,92 | -7,67%  | 115,00 | 108,00 | -7,00  | -6,09%  |
| F | 26,0<br>0 | 89,70  | 83,00  | -6,70  | -7,47%  | 1,60 | 35,04 | 32,42 | -2,62 | -7,47%  | 95,00  | 90,00  | -5,00  | -5,26%  |
| F | 45,0<br>0 | 82,50  | 75,40  | -7,10  | -8,61%  | 1,52 | 35,71 | 32,64 | -3,07 | -8,61%  | 105,00 | 99,00  | -6,00  | -5,71%  |
| F | 37,0<br>0 | 135,50 | 129,20 | -6,30  | -4,65%  | 1,74 | 44,75 | 42,67 | -2,08 | -4,65%  | 123,00 | 119,00 | -4,00  | -3,25%  |
| F | 51,0<br>0 | 97,10  | 90,50  | -6,60  | -6,80%  | 1,56 | 39,90 | 37,19 | -2,71 | -6,80%  | 117,00 | 113,00 | -4,00  | -3,42%  |
| F | 46,0<br>0 | 69,70  | 64,60  | -5,10  | -7,32%  | 1,50 | 30,98 | 28,71 | -2,27 | -7,32%  | 112,00 | 108,00 | -4,00  | -3,57%  |
| F | 33,0<br>0 | 85,80  | 74,80  | -11,00 | -12,82% | 1,65 | 31,52 | 27,47 | -4,04 | -12,82% | 96,00  | 94,00  | -2,00  | -2,08%  |
| F | 48,0<br>0 | 74,80  | 69,50  | -5,30  | -7,09%  | 1,59 | 29,59 | 27,49 | -2,10 | -7,09%  | 89,50  | 87,00  | -2,50  | -2,79%  |
| F | 29,0<br>0 | 78,50  | 73,00  | -5,50  | -7,01%  | 1,57 | 31,85 | 29,62 | -2,23 | -7,01%  | 95,00  | 91,00  | -4,00  | -4,21%  |
| F | 36,0<br>0 | 100,00 | 91,90  | -8,10  | -8,10%  | 1,63 | 37,64 | 34,59 | -3,05 | -8,10%  | 105,00 | 101,50 | -3,50  | -3,33%  |
| F | 42,0<br>0 | 90,80  | 83,00  | -7,80  | -8,59%  | 1,62 | 34,60 | 31,63 | -2,97 | -8,59%  | 113,00 | 106,00 | -7,00  | -6,19%  |
| F | 25,0<br>0 | 69,00  | 63,00  | -6,00  | -8,70%  | 1,58 | 27,64 | 25,24 | -2,40 | -8,70%  | 95,00  | 77,00  | -18,00 | -18,95% |

|   |       |        |        |        |         |      |       |       |       |         |        |        |        |         |
|---|-------|--------|--------|--------|---------|------|-------|-------|-------|---------|--------|--------|--------|---------|
| F | 40,00 | 98,00  | 86,40  | -11,60 | -11,84% | 1,68 | 34,72 | 30,61 | -4,11 | -11,84% | 118,00 | 105,00 | -13,00 | -11,02% |
| F | 29,00 | 97,50  | 87,00  | -10,50 | -10,77% | 1,63 | 36,70 | 32,74 | -3,95 | -10,77% | 105,00 | 99,00  | -6,00  | -5,71%  |
| F | 34,00 | 119,40 | 101,70 | -17,70 | -14,82% | 1,70 | 41,31 | 35,19 | -6,12 | -14,82% | 114,00 | 107,00 | -7,00  | -6,14%  |
| F | 30,00 | 90,20  | 80,80  | -9,40  | -10,42% | 1,60 | 35,23 | 31,56 | -3,67 | -10,42% | 95,00  | 86,00  | -9,00  | -9,47%  |
| F | 23,00 | 69,20  | 61,20  | -8,00  | -11,56% | 1,56 | 28,44 | 25,15 | -3,29 | -11,56% | 93,00  | 81,00  | -12,00 | -12,90% |
| F | 40,00 | 77,10  | 67,00  | -10,10 | -13,10% | 1,60 | 30,12 | 26,17 | -3,95 | -13,10% | 95,00  | 88,00  | -7,00  | -7,37%  |
| F | 46,00 | 96,40  | 87,40  | -9,00  | -9,34%  | 1,63 | 36,28 | 32,90 | -3,39 | -9,34%  | 116,00 | 96,00  | -20,00 | -17,24% |
| F | 52,00 | 109,50 | 99,60  | -9,90  | -9,04%  | 1,68 | 38,80 | 35,29 | -3,51 | -9,04%  | 122,00 | 116,00 | -6,00  | -4,92%  |
| F | 41,00 | 100,40 | 89,60  | -10,80 | -10,76% | 1,64 | 37,33 | 33,31 | -4,02 | -10,76% | 117,00 | 100,00 | -17,00 | -14,53% |
| F | 45,00 | 83,60  | 72,10  | -11,50 | -13,76% | 1,63 | 31,47 | 27,14 | -4,33 | -13,76% | 100,00 | 84,00  | -16,00 | -16,00% |
| F | 36,00 | 113,70 | 103,40 | -10,30 | -9,06%  | 1,60 | 44,41 | 40,39 | -4,02 | -9,06%  | 120,00 | 110,00 | -10,00 | -8,33%  |
| F | 22,00 | 120,90 | 111,70 | -9,20  | -7,61%  | 1,71 | 41,35 | 38,20 | -3,15 | -7,61%  | 106,00 | 96,00  | -10,00 | -9,43%  |
| F | 46,00 | 86,20  | 78,50  | -7,70  | -8,93%  | 1,57 | 34,97 | 31,85 | -3,12 | -8,93%  | 96,00  | 87,00  | -9,00  | -9,38%  |
| F | 36,00 | 102,60 | 95,30  | -7,30  | -7,12%  | 1,60 | 40,08 | 37,23 | -2,85 | -7,12%  | 124,00 | 119,00 | -5,00  | -4,03%  |
| F | 58,00 | 107,60 | 100,50 | -7,10  | -6,60%  | 1,60 | 42,03 | 39,26 | -2,77 | -6,60%  | 112,00 | 106,00 | -6,00  | -5,36%  |
| F | 43,00 | 101,50 | 94,60  | -6,90  | -6,80%  | 1,71 | 34,71 | 32,35 | -2,36 | -6,80%  | 115,00 | 107,00 | -8,00  | -6,96%  |

|   |           |        |        |        |         |      |       |       |       |         |        |        |        |         |
|---|-----------|--------|--------|--------|---------|------|-------|-------|-------|---------|--------|--------|--------|---------|
| F | 27,0<br>0 | 120,20 | 113,80 | -6,40  | -5,32%  | 1,60 | 46,95 | 44,45 | -2,50 | -5,32%  | 137,00 | 126,00 | -11,00 | -8,03%  |
| F | 44,0<br>0 | 101,50 | 93,20  | -8,30  | -8,18%  | 1,76 | 32,77 | 30,09 | -2,68 | -8,18%  | 105,00 | 97,00  | -8,00  | -7,62%  |
| F | 28,0<br>0 | 101,10 | 93,70  | -7,40  | -7,32%  | 1,55 | 42,08 | 39,00 | -3,08 | -7,32%  | 104,00 | 96,00  | -8,00  | -7,69%  |
| F | 42,0<br>0 | 82,20  | 75,90  | -6,30  | -7,66%  | 1,59 | 32,51 | 30,02 | -2,49 | -7,66%  | 107,00 | 95,00  | -12,00 | -11,21% |
| F | 24,0<br>0 | 77,30  | 71,50  | -5,80  | -7,50%  | 1,65 | 28,39 | 26,26 | -2,13 | -7,50%  | 96,00  | 84,00  | -12,00 | -12,50% |
| F | 52,0<br>0 | 77,20  | 71,60  | -5,60  | -7,25%  | 1,68 | 27,35 | 25,37 | -1,98 | -7,25%  | 98,00  | 85,00  | -13,00 | -13,27% |
| F | 51,0<br>0 | 82,50  | 77,10  | -5,40  | -6,55%  | 1,56 | 33,90 | 31,68 | -2,22 | -6,55%  | 122,00 | 101,00 | -21,00 | -17,21% |
| F | 58,0<br>0 | 70,50  | 65,20  | -5,30  | -7,52%  | 1,52 | 30,51 | 28,22 | -2,29 | -7,52%  | 93,00  | 86,00  | -7,00  | -7,53%  |
| F | 52,0<br>0 | 80,40  | 76,10  | -4,30  | -5,35%  | 1,55 | 33,47 | 31,68 | -1,79 | -5,35%  | 102,00 | 96,00  | -6,00  | -5,88%  |
| F | 36,0<br>0 | 75,00  | 63,20  | -11,80 | -15,73% | 1,60 | 29,30 | 24,69 | -4,61 | -15,73% | 102,00 | 86,00  | -16,00 | -15,69% |
| F | 26,0<br>0 | 122,40 | 112,40 | -10,00 | -8,17%  | 1,69 | 42,86 | 39,35 | -3,50 | -8,17%  | 134,00 | 126,00 | -8,00  | -5,97%  |
| F | 53,0<br>0 | 90,20  | 79,70  | -10,50 | -11,64% | 1,70 | 31,21 | 27,58 | -3,63 | -11,64% | 108,00 | 90,00  | -18,00 | -16,67% |
| F | 32,0<br>0 | 95,60  | 83,50  | -12,10 | -12,66% | 1,67 | 34,28 | 29,94 | -4,34 | -12,66% | 111,00 | 92,00  | -19,00 | -17,12% |
| F | 66,0<br>0 | 114,10 | 102,00 | -12,10 | -10,60% | 1,72 | 38,57 | 34,48 | -4,09 | -10,60% | 118,00 | 105,00 | -13,00 | -11,02% |
| F | 28,0<br>0 | 101,10 | 86,00  | -15,10 | -14,94% | 1,75 | 33,01 | 28,08 | -4,93 | -14,94% | 136,00 | 105,00 | -31,00 | -22,79% |
| F | 29,0<br>0 | 82,20  | 70,10  | -12,10 | -14,72% | 1,63 | 30,94 | 26,38 | -4,55 | -14,72% | 104,00 | 84,00  | -20,00 | -19,23% |

|   |       |        |        |        |         |      |       |       |       |         |        |        |        |         |
|---|-------|--------|--------|--------|---------|------|-------|-------|-------|---------|--------|--------|--------|---------|
| F | 37,00 | 82,00  | 76,30  | -5,70  | -6,95%  | 1,67 | 29,40 | 27,36 | -2,04 | -6,95%  | 109,00 | 103,00 | -6,00  | -5,50%  |
| F | 25,00 | 97,90  | 88,40  | -9,50  | -9,70%  | 1,58 | 39,22 | 35,41 | -3,81 | -9,70%  | 120,00 | 115,00 | -5,00  | -4,17%  |
| F | 40,00 | 137,30 | 124,40 | -12,90 | -9,40%  | 1,76 | 44,32 | 40,16 | -4,16 | -9,40%  | 136,00 | 127,00 | -9,00  | -6,62%  |
| F | 31,00 | 68,90  | 64,20  | -4,70  | -6,82%  | 1,64 | 25,62 | 23,87 | -1,75 | -6,82%  | 90,00  | 84,00  | -6,00  | -6,67%  |
| F | 24,00 | 113,60 | 104,80 | -8,80  | -7,75%  | 1,70 | 39,31 | 36,26 | -3,04 | -7,75%  | 111,00 | 109,50 | -1,50  | -1,35%  |
| F | 61,00 | 65,40  | 55,10  | -10,30 | -15,75% | 1,52 | 28,31 | 23,85 | -4,46 | -15,75% | 91,00  | 76,00  | -15,00 | -16,48% |
| F | 27,00 | 105,90 | 97,50  | -8,40  | -7,93%  | 1,68 | 37,52 | 34,55 | -2,98 | -7,93%  | 115,00 | 111,00 | -4,00  | -3,48%  |
| F | 37,00 | 72,70  | 67,10  | -5,60  | -7,70%  | 1,70 | 25,16 | 23,22 | -1,94 | -7,70%  | 98,00  | 94,00  | -4,00  | -4,08%  |
| F | 38,00 | 73,00  | 67,30  | -5,70  | -7,81%  | 1,50 | 32,44 | 29,91 | -2,53 | -7,81%  | 105,00 | 96,00  | -9,00  | -8,57%  |
| F | 39,00 | 86,70  | 78,60  | -8,10  | -9,34%  | 1,56 | 35,63 | 32,30 | -3,33 | -9,34%  | 114,00 | 106,00 | -8,00  | -7,02%  |
| F | 35,00 | 129,80 | 114,10 | -15,70 | -12,10% | 1,72 | 43,88 | 38,57 | -5,31 | -12,10% | 131,50 | 121,50 | -10,00 | -7,60%  |
| F | 38,00 | 78,70  | 71,50  | -7,20  | -9,15%  | 1,71 | 26,91 | 24,45 | -2,46 | -9,15%  | 95,00  | 85,00  | -10,00 | -10,53% |
| F | 36,00 | 73,80  | 66,60  | -7,20  | -9,76%  | 1,63 | 27,78 | 25,07 | -2,71 | -9,76%  | 88,00  | 83,00  | -5,00  | -5,68%  |
| F | 29,00 | 77,20  | 70,60  | -6,60  | -8,55%  | 1,65 | 28,36 | 25,93 | -2,42 | -8,55%  | 84,50  | 75,30  | -9,20  | -10,89% |
| F | 35,00 | 65,10  | 59,50  | -5,60  | -8,60%  | 1,61 | 25,11 | 22,95 | -2,16 | -8,60%  | 77,50  | 71,50  | -6,00  | -7,74%  |
| F | 53,00 | 68,90  | 63,40  | -5,50  | -7,98%  | 1,76 | 22,24 | 20,47 | -1,78 | -7,98%  | 91,50  | 86,00  | -5,50  | -6,01%  |

|   |       |        |        |        |         |      |       |       |       |         |        |        |        |         |
|---|-------|--------|--------|--------|---------|------|-------|-------|-------|---------|--------|--------|--------|---------|
| F | 21,00 | 82,10  | 74,70  | -7,40  | -9,01%  | 1,85 | 23,99 | 21,83 | -2,16 | -9,01%  | 92,00  | 86,00  | -6,00  | -6,52%  |
| F | 24,00 | 77,90  | 71,20  | -6,70  | -8,60%  | 1,69 | 27,27 | 24,93 | -2,35 | -8,60%  | 86,00  | 81,00  | -5,00  | -5,81%  |
| F | 30,00 | 74,40  | 68,40  | -6,00  | -8,06%  | 1,70 | 25,74 | 23,67 | -2,08 | -8,06%  | 89,00  | 81,00  | -8,00  | -8,99%  |
| F | 45,00 | 69,20  | 60,40  | -8,80  | -12,72% | 1,58 | 27,72 | 24,19 | -3,53 | -12,72% | 105,00 | 96,00  | -9,00  | -8,57%  |
| F | 42,00 | 68,50  | 62,50  | -6,00  | -8,76%  | 1,63 | 25,78 | 23,52 | -2,26 | -8,76%  | 93,20  | 90,00  | -3,20  | -3,43%  |
| F | 63,00 | 84,70  | 77,70  | -7,00  | -8,26%  | 1,59 | 33,50 | 30,73 | -2,77 | -8,26%  | 122,00 | 112,00 | -10,00 | -8,20%  |
| F | 42,00 | 91,40  | 84,10  | -7,30  | -7,99%  | 1,67 | 32,77 | 30,16 | -2,62 | -7,99%  | 106,00 | 100,00 | -6,00  | -5,66%  |
| F | 39,00 | 117,50 | 109,60 | -7,90  | -6,72%  | 1,78 | 37,08 | 34,59 | -2,49 | -6,72%  | 131,00 | 128,50 | -2,50  | -1,91%  |
| F | 23,00 | 84,30  | 74,40  | -9,90  | -11,74% | 1,57 | 34,20 | 30,18 | -4,02 | -11,74% | 98,00  | 90,00  | -8,00  | -8,16%  |
| F | 46,00 | 90,00  | 81,80  | -8,20  | -9,11%  | 1,62 | 34,29 | 31,17 | -3,12 | -9,11%  | 91,00  | 89,00  | -2,00  | -2,20%  |
| F | 58,00 | 98,00  | 89,80  | -8,20  | -8,37%  | 1,58 | 39,26 | 35,97 | -3,28 | -8,37%  | 110,00 | 108,50 | -1,50  | -1,36%  |
| F | 45,00 | 77,50  | 71,90  | -5,60  | -7,23%  | 1,65 | 28,47 | 26,41 | -2,06 | -7,23%  | 81,00  | 76,00  | -5,00  | -6,17%  |
| F | 54,00 | 89,00  | 81,00  | -8,00  | -8,99%  | 1,61 | 34,34 | 31,25 | -3,09 | -8,99%  | 100,00 | 91,00  | -9,00  | -9,00%  |
| F | 20,00 | 80,30  | 70,60  | -9,70  | -12,08% | 1,63 | 30,22 | 26,57 | -3,65 | -12,08% | 90,00  | 80,00  | -10,00 | -11,11% |
| F | 52,00 | 100,70 | 90,50  | -10,20 | -10,13% | 1,69 | 35,26 | 31,69 | -3,57 | -10,13% | 111,00 | 100,00 | -11,00 | -9,91%  |
| F | 40,00 | 80,30  | 74,50  | -5,80  | -7,22%  | 1,62 | 30,60 | 28,39 | -2,21 | -7,22%  | 89,00  | 82,00  | -7,00  | -7,87%  |

|   |           |        |        |        |         |      |       |       |       |         |        |        |        |         |
|---|-----------|--------|--------|--------|---------|------|-------|-------|-------|---------|--------|--------|--------|---------|
| F | 45,0<br>0 | 111,30 | 105,10 | -6,20  | -5,57%  | 1,78 | 35,13 | 33,17 | -1,96 | -5,57%  | 110,00 | 104,00 | -6,00  | -5,45%  |
| F | 32,0<br>0 | 99,30  | 90,80  | -8,50  | -8,56%  | 1,68 | 35,18 | 32,17 | -3,01 | -8,56%  | 105,00 | 91,00  | -14,00 | -13,33% |
| F | 39,0<br>0 | 113,30 | 106,80 | -6,50  | -5,74%  | 1,73 | 37,86 | 35,68 | -2,17 | -5,74%  | 115,00 | 115,00 | 0,00   | 0,00%   |
| F | 48,0<br>0 | 63,70  | 56,50  | -7,20  | -11,30% | 1,60 | 24,88 | 22,07 | -2,81 | -11,30% | 77,00  | 73,00  | -4,00  | -5,19%  |
| F | 39,0<br>0 | 82,30  | 75,30  | -7,00  | -8,51%  | 1,58 | 32,97 | 30,16 | -2,80 | -8,51%  | 99,00  | 87,00  | -12,00 | -12,12% |
| F | 42,0<br>0 | 71,20  | 65,60  | -5,60  | -7,87%  | 1,56 | 29,26 | 26,96 | -2,30 | -7,87%  | 92,00  | 81,00  | -11,00 | -11,96% |
| F | 50,0<br>0 | 126,20 | 116,70 | -9,50  | -7,53%  | 1,85 | 36,87 | 34,10 | -2,78 | -7,53%  | 124,00 | 119,00 | -5,00  | -4,03%  |
| F | 36,0<br>0 | 115,60 | 106,90 | -8,70  | -7,53%  | 1,78 | 36,49 | 33,74 | -2,75 | -7,53%  | 118,00 | 112,00 | -6,00  | -5,08%  |
| F | 30,0<br>0 | 118,60 | 109,90 | -8,70  | -7,34%  | 1,76 | 38,29 | 35,48 | -2,81 | -7,34%  | 120,00 | 112,00 | -8,00  | -6,67%  |
| F | 18,0<br>0 | 117,10 | 106,60 | -10,50 | -8,97%  | 1,80 | 36,14 | 32,90 | -3,24 | -8,97%  | 120,00 | 109,00 | -11,00 | -9,17%  |
| F | 48,0<br>0 | 137,70 | 127,70 | -10,00 | -7,26%  | 1,80 | 42,50 | 39,41 | -3,09 | -7,26%  | 127,00 | 114,00 | -13,00 | -10,24% |
| F | 36,0<br>0 | 94,40  | 84,60  | -9,80  | -10,38% | 1,63 | 35,53 | 31,84 | -3,69 | -10,38% | 102,00 | 95,00  | -7,00  | -6,86%  |
| F | 19,0<br>0 | 74,10  | 71,10  | -3,00  | -4,05%  | 1,74 | 24,47 | 23,48 | -0,99 | -4,05%  | 81,00  | 76,00  | -5,00  | -6,17%  |
| F | 37,0<br>0 | 85,10  | 77,90  | -7,20  | -8,46%  | 1,88 | 24,08 | 22,04 | -2,04 | -8,46%  | 99,00  | 89,00  | -10,00 | -10,10% |
| F | 23,0<br>0 | 88,50  | 82,30  | -6,20  | -7,01%  | 1,61 | 34,14 | 31,75 | -2,39 | -7,01%  | 108,00 | 99,00  | -9,00  | -8,33%  |
| F | 36,0<br>0 | 97,70  | 94,40  | -3,30  | -3,38%  | 1,69 | 34,21 | 33,05 | -1,16 | -3,38%  | 109,00 | 105,00 | -4,00  | -3,67%  |

|   |       |        |        |        |         |      |       |       |       |         |        |        |        |         |
|---|-------|--------|--------|--------|---------|------|-------|-------|-------|---------|--------|--------|--------|---------|
| F | 30,00 | 88,00  | 80,80  | -7,20  | -8,18%  | 1,63 | 33,12 | 30,41 | -2,71 | -8,18%  | 97,00  | 89,00  | -8,00  | -8,25%  |
| F | 21,00 | 98,40  | 90,30  | -8,10  | -8,23%  | 1,70 | 34,05 | 31,25 | -2,80 | -8,23%  | 99,00  | 92,00  | -7,00  | -7,07%  |
| F | 49,00 | 61,40  | 56,43  | -4,97  | -8,09%  | 1,72 | 20,75 | 19,07 | -1,68 | -8,09%  | 83,50  | 78,50  | -5,00  | -5,99%  |
| F | 36,00 | 80,00  | 72,60  | -7,40  | -9,25%  | 1,75 | 26,12 | 23,71 | -2,42 | -9,25%  | 99,00  | 93,00  | -6,00  | -6,06%  |
| F | 21,00 | 61,00  | 56,00  | -5,00  | -8,20%  | 1,70 | 21,11 | 19,38 | -1,73 | -8,20%  | 85,00  | 78,00  | -7,00  | -8,24%  |
| F | 38,00 | 75,60  | 69,60  | -6,00  | -7,94%  | 1,60 | 29,53 | 27,19 | -2,34 | -7,94%  | 90,00  | 85,00  | -5,00  | -5,56%  |
| F | 49,00 | 124,10 | 108,30 | -15,80 | -12,73% | 1,76 | 40,06 | 34,96 | -5,10 | -12,73% | 124,00 | 117,00 | -7,00  | -5,65%  |
| F | 45,00 | 84,90  | 78,00  | -6,90  | -8,13%  | 1,66 | 30,81 | 28,31 | -2,50 | -8,13%  | 109,00 | 99,00  | -10,00 | -9,17%  |
| F | 28,00 | 60,70  | 55,50  | -5,20  | -8,57%  | 1,60 | 23,71 | 21,68 | -2,03 | -8,57%  | 83,00  | 79,00  | -4,00  | -4,82%  |
| F | 35,00 | 88,80  | 82,70  | -6,10  | -6,87%  | 1,75 | 29,00 | 27,00 | -1,99 | -6,87%  | 99,50  | 94,50  | -5,00  | -5,03%  |
| F | 31,00 | 95,70  | 89,50  | -6,20  | -6,48%  | 1,73 | 31,98 | 29,90 | -2,07 | -6,48%  | 108,50 | 103,50 | -5,00  | -4,61%  |
| F | 28,00 | 92,40  | 86,60  | -5,80  | -6,28%  | 1,74 | 30,52 | 28,60 | -1,92 | -6,28%  | 111,00 | 105,00 | -6,00  | -5,41%  |
| F | 29,00 | 76,20  | 73,10  | -3,10  | -4,07%  | 1,70 | 26,37 | 25,29 | -1,07 | -4,07%  | 99,50  | 96,00  | -3,50  | -3,52%  |
| F | 47,00 | 76,00  | 69,00  | -7,00  | -9,21%  | 1,53 | 32,47 | 29,48 | -2,99 | -9,21%  | 99,00  | 95,00  | -4,00  | -4,04%  |
| F | 42,00 | 86,00  | 78,00  | -8,00  | -9,30%  | 1,63 | 32,37 | 29,36 | -3,01 | -9,30%  | 101,50 | 96,50  | -5,00  | -4,93%  |
| F | 18,00 | 97,30  | 89,00  | -8,30  | -8,53%  | 1,71 | 33,28 | 30,44 | -2,84 | -8,53%  | 98,00  | 88,00  | -10,00 | -10,20% |

|   |           |        |        |        |         |      |       |       |       |         |        |        |        |        |
|---|-----------|--------|--------|--------|---------|------|-------|-------|-------|---------|--------|--------|--------|--------|
| F | 41,0<br>0 | 81,30  | 73,10  | -8,20  | -10,09% | 1,59 | 32,16 | 28,91 | -3,24 | -10,09% | 88,00  | 82,00  | -6,00  | -6,82% |
| F | 56,0<br>0 | 79,10  | 73,90  | -5,20  | -6,57%  | 1,79 | 24,69 | 23,06 | -1,62 | -6,57%  | 92,00  | 87,00  | -5,00  | -5,43% |
| F | 36,0<br>0 | 66,10  | 60,00  | -6,10  | -9,23%  | 1,53 | 28,24 | 25,63 | -2,61 | -9,23%  | 83,00  | 76,00  | -7,00  | -8,43% |
| F | 28,0<br>0 | 77,10  | 72,70  | -4,40  | -5,71%  | 1,60 | 30,12 | 28,40 | -1,72 | -5,71%  | 88,00  | 83,00  | -5,00  | -5,68% |
| F | 41,0<br>0 | 90,60  | 85,60  | -5,00  | -5,52%  | 1,69 | 31,72 | 29,97 | -1,75 | -5,52%  | 88,00  | 84,00  | -4,00  | -4,55% |
| F | 36,0<br>0 | 83,60  | 75,30  | -8,30  | -9,93%  | 1,56 | 34,35 | 30,94 | -3,41 | -9,93%  | 99,00  | 92,00  | -7,00  | -7,07% |
| F | 25,0<br>0 | 71,20  | 64,40  | -6,80  | -9,55%  | 1,59 | 28,16 | 25,47 | -2,69 | -9,55%  | 95,00  | 87,00  | -8,00  | -8,42% |
| F | 22,0<br>0 | 124,20 | 111,90 | -12,30 | -9,90%  | 1,83 | 37,09 | 33,41 | -3,67 | -9,90%  | 127,00 | 116,00 | -11,00 | -8,66% |
| F | 35,0<br>0 | 165,50 | 154,20 | -11,30 | -6,83%  | 1,90 | 45,84 | 42,71 | -3,13 | -6,83%  | 155,00 | 148,00 | -7,00  | -4,52% |
| F | 18,0<br>0 | 89,00  | 82,80  | -6,20  | -6,97%  | 1,63 | 33,50 | 31,16 | -2,33 | -6,97%  | 105,00 | 99,00  | -6,00  | -5,71% |
| F | 42,0<br>0 | 164,40 | 154,40 | -10,00 | -6,08%  | 1,82 | 49,63 | 46,61 | -3,02 | -6,08%  | 136,00 | 128,00 | -8,00  | -5,88% |
| F | 49,0<br>0 | 83,60  | 78,00  | -5,60  | -6,70%  | 1,62 | 31,85 | 29,72 | -2,13 | -6,70%  | 103,00 | 98,00  | -5,00  | -4,85% |
| F | 43,0<br>0 | 55,70  | 47,30  | -8,40  | -15,08% | 1,52 | 24,11 | 20,47 | -3,64 | -15,08% | 86,00  | 80,00  | -6,00  | -6,98% |
| F | 22,0<br>0 | 84,10  | 79,00  | -5,10  | -6,06%  | 1,51 | 36,88 | 34,65 | -2,24 | -6,06%  | 100,00 | 99,00  | -1,00  | -1,00% |
| F | 44,0<br>0 | 61,90  | 54,20  | -7,70  | -12,44% | 1,50 | 27,51 | 24,09 | -3,42 | -12,44% | 93,00  | 84,00  | -9,00  | -9,68% |
| F | 51,0<br>0 | 75,60  | 70,60  | -5,00  | -6,61%  | 1,66 | 27,44 | 25,62 | -1,81 | -6,61%  | 93,00  | 88,00  | -5,00  | -5,38% |

|   |           |        |        |        |         |      |       |       |       |         |        |        |        |         |
|---|-----------|--------|--------|--------|---------|------|-------|-------|-------|---------|--------|--------|--------|---------|
| F | 37,0<br>0 | 62,30  | 57,10  | -5,20  | -8,35%  | 1,76 | 20,11 | 18,43 | -1,68 | -8,35%  | 89,00  | 84,00  | -5,00  | -5,62%  |
| F | 48,0<br>0 | 80,90  | 73,90  | -7,00  | -8,65%  | 1,72 | 27,35 | 24,98 | -2,37 | -8,65%  | 102,00 | 98,00  | -4,00  | -3,92%  |
| F | 44,0<br>0 | 139,90 | 127,70 | -12,20 | -8,72%  | 1,61 | 53,97 | 49,27 | -4,71 | -8,72%  | 136,00 | 120,00 | -16,00 | -11,76% |
| F | 39,0<br>0 | 95,00  | 86,30  | -8,70  | -9,16%  | 1,73 | 31,74 | 28,83 | -2,91 | -9,16%  | 107,00 | 96,00  | -11,00 | -10,28% |
| F | 52,0<br>0 | 73,50  | 65,50  | -8,00  | -10,88% | 1,55 | 30,59 | 27,26 | -3,33 | -10,88% | 93,00  | 88,00  | -5,00  | -5,38%  |
| F | 46,0<br>0 | 111,00 | 104,10 | -6,90  | -6,22%  | 1,76 | 35,83 | 33,61 | -2,23 | -6,22%  | 115,00 | 109,00 | -6,00  | -5,22%  |
| F | 39,0<br>0 | 90,50  | 84,20  | -6,30  | -6,96%  | 1,60 | 35,35 | 32,89 | -2,46 | -6,96%  | 100,00 | 98,00  | -2,00  | -2,00%  |
| F | 47,0<br>0 | 74,20  | 68,10  | -6,10  | -8,22%  | 1,63 | 27,93 | 25,63 | -2,30 | -8,22%  | 90,00  | 81,00  | -9,00  | -10,00% |
| F | 44,0<br>0 | 89,80  | 83,80  | -6,00  | -6,68%  | 1,67 | 32,20 | 30,05 | -2,15 | -6,68%  | 120,00 | 116,00 | -4,00  | -3,33%  |
| F | 43,0<br>0 | 105,10 | 99,10  | -6,00  | -5,71%  | 1,68 | 37,24 | 35,11 | -2,13 | -5,71%  | 114,00 | 107,00 | -7,00  | -6,14%  |
| F | 30,0<br>0 | 72,40  | 66,80  | -5,60  | -7,73%  | 1,72 | 24,47 | 22,58 | -1,89 | -7,73%  | 89,00  | 82,00  | -7,00  | -7,87%  |
| F | 43,0<br>0 | 108,70 | 98,40  | -10,30 | -9,48%  | 1,70 | 37,61 | 34,05 | -3,56 | -9,48%  | 110,00 | 105,00 | -5,00  | -4,55%  |
| F | 23,0<br>0 | 87,40  | 80,20  | -7,20  | -8,24%  | 1,55 | 36,38 | 33,38 | -3,00 | -8,24%  | 106,00 | 100,00 | -6,00  | -5,66%  |
| F | 29,0<br>0 | 99,20  | 93,10  | -6,10  | -6,15%  | 1,71 | 33,92 | 31,84 | -2,09 | -6,15%  | 104,00 | 100,00 | -4,00  | -3,85%  |
| F | 27,0<br>0 | 91,40  | 83,70  | -7,70  | -8,42%  | 1,60 | 35,70 | 32,70 | -3,01 | -8,42%  | 101,00 | 90,00  | -11,00 | -10,89% |
| F | 39,0<br>0 | 62,50  | 57,70  | -4,80  | -7,68%  | 1,57 | 25,36 | 23,41 | -1,95 | -7,68%  | 81,00  | 71,00  | -10,00 | -12,35% |

|   |       |        |        |        |         |      |       |       |       |         |        |        |        |         |
|---|-------|--------|--------|--------|---------|------|-------|-------|-------|---------|--------|--------|--------|---------|
| F | 30,00 | 94,90  | 85,60  | -9,30  | -9,80%  | 1,85 | 27,73 | 25,01 | -2,72 | -9,80%  | 104,00 | 94,00  | -10,00 | -9,62%  |
| F | 34,00 | 85,20  | 77,20  | -8,00  | -9,39%  | 1,70 | 29,48 | 26,71 | -2,77 | -9,39%  | 96,00  | 89,00  | -7,00  | -7,29%  |
| F | 41,00 | 120,50 | 114,50 | -6,00  | -4,98%  | 1,74 | 39,80 | 37,82 | -1,98 | -4,98%  | 127,00 | 123,00 | -4,00  | -3,15%  |
| F | 43,00 | 67,60  | 61,40  | -6,20  | -9,17%  | 1,64 | 25,13 | 22,83 | -2,31 | -9,17%  | 77,00  | 74,00  | -3,00  | -3,90%  |
| F | 49,00 | 105,40 | 97,60  | -7,80  | -7,40%  | 1,68 | 37,34 | 34,58 | -2,76 | -7,40%  | 120,00 | 116,00 | -4,00  | -3,33%  |
| F | 65,00 | 93,20  | 88,20  | -5,00  | -5,36%  | 1,63 | 35,08 | 33,20 | -1,88 | -5,36%  | 107,00 | 103,00 | -4,00  | -3,74%  |
| F | 42,00 | 80,10  | 75,20  | -4,90  | -6,12%  | 1,67 | 28,72 | 26,96 | -1,76 | -6,12%  | 83,00  | 78,00  | -5,00  | -6,02%  |
| F | 34,00 | 93,40  | 86,10  | -7,30  | -7,82%  | 1,74 | 30,85 | 28,44 | -2,41 | -7,82%  | 100,00 | 91,00  | -9,00  | -9,00%  |
| F | 35,00 | 124,30 | 111,90 | -12,40 | -9,98%  | 1,88 | 35,17 | 31,66 | -3,51 | -9,98%  | 124,00 | 110,00 | -14,00 | -11,29% |
| F | 39,00 | 62,40  | 55,30  | -7,10  | -11,38% | 1,61 | 24,07 | 21,33 | -2,74 | -11,38% | 91,00  | 78,00  | -13,00 | -14,29% |
| F | 32,00 | 77,20  | 73,20  | -4,00  | -5,18%  | 1,67 | 27,68 | 26,25 | -1,43 | -5,18%  | 83,00  | 79,00  | -4,00  | -4,82%  |
| F | 28,00 | 60,50  | 52,60  | -7,90  | -13,06% | 1,63 | 22,77 | 19,80 | -2,97 | -13,06% | 77,00  | 69,00  | -8,00  | -10,39% |
| F | 64,00 | 78,10  | 71,40  | -6,70  | -8,58%  | 1,63 | 29,40 | 26,87 | -2,52 | -8,58%  | 100,00 | 91,00  | -9,00  | -9,00%  |
| F | 38,00 | 91,40  | 83,90  | -7,50  | -8,21%  | 1,70 | 31,63 | 29,03 | -2,60 | -8,21%  | 105,00 | 97,00  | -8,00  | -7,62%  |
| F | 34,00 | 114,90 | 106,40 | -8,50  | -7,40%  | 1,72 | 38,84 | 35,97 | -2,87 | -7,40%  | 113,00 | 102,00 | -11,00 | -9,73%  |
| F | 30,00 | 72,40  | 66,80  | -5,60  | -7,73%  | 1,74 | 23,91 | 22,06 | -1,85 | -7,73%  | 89,00  | 82,00  | -7,00  | -7,87%  |

|   |       |        |        |        |         |      |       |       |       |         |        |        |        |         |
|---|-------|--------|--------|--------|---------|------|-------|-------|-------|---------|--------|--------|--------|---------|
| F | 53,00 | 128,70 | 118,40 | -10,30 | -8,00%  | 1,52 | 55,70 | 51,25 | -4,46 | -8,00%  | 120,00 | 115,00 | -5,00  | -4,17%  |
| F | 23,00 | 87,40  | 80,20  | -7,20  | -8,24%  | 1,73 | 29,20 | 26,80 | -2,41 | -8,24%  | 106,00 | 100,00 | -6,00  | -5,66%  |
| F | 29,00 | 99,20  | 93,10  | -6,10  | -6,15%  | 1,79 | 30,96 | 29,06 | -1,90 | -6,15%  | 104,00 | 100,00 | -4,00  | -3,85%  |
| F | 27,00 | 91,40  | 83,70  | -7,70  | -8,42%  | 1,69 | 32,00 | 29,31 | -2,70 | -8,42%  | 109,00 | 98,00  | -11,00 | -10,09% |
| F | 39,00 | 62,50  | 57,70  | -4,80  | -7,68%  | 1,58 | 25,04 | 23,11 | -1,92 | -7,68%  | 81,00  | 71,00  | -10,00 | -12,35% |
| F | 34,00 | 71,00  | 60,00  | -11,00 | -15,49% | 1,65 | 26,08 | 22,04 | -4,04 | -15,49% | 90,00  | 81,00  | -9,00  | -10,00% |
| F | 44,00 | 78,00  | 71,00  | -7,00  | -8,97%  | 1,62 | 29,72 | 27,05 | -2,67 | -8,97%  | 97,00  | 91,00  | -6,00  | -6,19%  |
| F | 46,00 | 89,90  | 81,30  | -8,60  | -9,57%  | 1,59 | 35,56 | 32,16 | -3,40 | -9,57%  | 85,00  | 79,00  | -6,00  | -7,06%  |
| F | 61,00 | 93,70  | 86,70  | -7,00  | -7,47%  | 1,64 | 34,84 | 32,24 | -2,60 | -7,47%  | 109,00 | 103,00 | -6,00  | -5,50%  |
| F | 51,00 | 78,50  | 80,90  | 2,40   | 3,06%   | 1,61 | 30,28 | 31,21 | 0,93  | 3,06%   | 109,00 | 102,00 | -7,00  | -6,42%  |
| F | 25,00 | 91,40  | 85,00  | -6,40  | -7,00%  | 1,70 | 31,63 | 29,41 | -2,21 | -7,00%  | 97,00  | 91,00  | -6,00  | -6,19%  |
| F | 24,00 | 70,90  | 64,70  | -6,20  | -8,74%  | 1,61 | 27,35 | 24,96 | -2,39 | -8,74%  | 90,00  | 84,00  | -6,00  | -6,67%  |
| F | 32,00 | 98,00  | 91,90  | -6,10  | -6,22%  | 1,67 | 35,14 | 32,95 | -2,19 | -6,22%  | 96,00  | 92,00  | -4,00  | -4,17%  |
| F | 29,00 | 84,40  | 78,70  | -5,70  | -6,75%  | 1,63 | 31,77 | 29,62 | -2,15 | -6,75%  | 104,00 | 97,00  | -7,00  | -6,73%  |
| F | 40,00 | 78,10  | 72,80  | -5,30  | -6,79%  | 1,65 | 28,69 | 26,74 | -1,95 | -6,79%  | 83,00  | 79,00  | -4,00  | -4,82%  |
| F | 42,00 | 69,60  | 64,00  | -5,60  | -8,05%  | 1,85 | 20,34 | 18,70 | -1,64 | -8,05%  | 87,00  | 80,00  | -7,00  | -8,05%  |

|   |           |        |        |        |         |      |       |       |       |         |        |        |        |         |
|---|-----------|--------|--------|--------|---------|------|-------|-------|-------|---------|--------|--------|--------|---------|
| F | 24,0<br>0 | 76,30  | 71,30  | -5,00  | -6,55%  | 1,64 | 28,37 | 26,51 | -1,86 | -6,55%  | 95,00  | 85,00  | -10,00 | -10,53% |
| F | 22,0<br>0 | 70,70  | 68,50  | -2,20  | -3,11%  | 1,55 | 29,43 | 28,51 | -0,92 | -3,11%  | 92,00  | 92,00  | 0,00   | 0,00%   |
| F | 28,0<br>0 | 65,10  | 63,80  | -1,30  | -2,00%  | 1,62 | 24,81 | 24,31 | -0,50 | -2,00%  | 86,00  | 83,00  | -3,00  | -3,49%  |
| F | 36,0<br>0 | 109,00 | 106,00 | -3,00  | -2,75%  | 1,74 | 36,00 | 35,01 | -0,99 | -2,75%  | 104,00 | 98,00  | -6,00  | -5,77%  |
| F | 39,0<br>0 | 114,40 | 110,30 | -4,10  | -3,58%  | 1,76 | 36,93 | 35,61 | -1,32 | -3,58%  | 117,00 | 107,00 | -10,00 | -8,55%  |
| F | 36,0<br>0 | 124,30 | 118,50 | -5,80  | -4,67%  | 1,81 | 37,94 | 36,17 | -1,77 | -4,67%  | 119,00 | 116,00 | -3,00  | -2,52%  |
| F | 40,0<br>0 | 82,40  | 76,10  | -6,30  | -7,65%  | 1,71 | 28,18 | 26,03 | -2,15 | -7,65%  | 96,00  | 93,00  | -3,00  | -3,13%  |
| F | 42,0<br>0 | 85,00  | 71,80  | -13,20 | -15,53% | 1,60 | 33,20 | 28,05 | -5,16 | -15,53% | 103,00 | 83,00  | -20,00 | -19,42% |
| F | 52,0<br>0 | 129,50 | 121,00 | -8,50  | -6,56%  | 1,78 | 40,87 | 38,19 | -2,68 | -6,56%  | 123,00 | 117,00 | -6,00  | -4,88%  |
| F | 38,0<br>0 | 120,30 | 113,20 | -7,10  | -5,90%  | 1,71 | 41,14 | 38,71 | -2,43 | -5,90%  | 119,00 | 111,00 | -8,00  | -6,72%  |
| F | 59,0<br>0 | 94,40  | 87,40  | -7,00  | -7,42%  | 1,68 | 33,45 | 30,97 | -2,48 | -7,42%  | 107,00 | 97,00  | -10,00 | -9,35%  |
| F | 65,0<br>0 | 104,70 | 97,20  | -7,50  | -7,16%  | 1,62 | 39,89 | 37,04 | -2,86 | -7,16%  | 107,00 | 93,00  | -14,00 | -13,08% |
| F | 52,0<br>0 | 83,50  | 76,50  | -7,00  | -8,38%  | 1,64 | 31,05 | 28,44 | -2,60 | -8,38%  | 98,00  | 93,00  | -5,00  | -5,10%  |
| F | 45,0<br>0 | 100,20 | 89,40  | -10,80 | -10,78% | 1,60 | 39,14 | 34,92 | -4,22 | -10,78% | 99,00  | 90,00  | -9,00  | -9,09%  |
| F | 27,0<br>0 | 106,90 | 97,30  | -9,60  | -8,98%  | 1,73 | 35,72 | 32,51 | -3,21 | -8,98%  | 108,00 | 101,00 | -7,00  | -6,48%  |
| F | 19,0<br>0 | 110,00 | 101,70 | -8,30  | -7,55%  | 1,69 | 38,51 | 35,61 | -2,91 | -7,55%  | 124,00 | 118,00 | -6,00  | -4,84%  |

|   |       |        |        |        |         |      |       |       |       |         |        |        |        |         |
|---|-------|--------|--------|--------|---------|------|-------|-------|-------|---------|--------|--------|--------|---------|
| F | 52,00 | 104,20 | 89,10  | -15,10 | -14,49% | 1,83 | 31,11 | 26,61 | -4,51 | -14,49% | 124,00 | 114,00 | -10,00 | -8,06%  |
| F | 24,00 | 87,50  | 77,00  | -10,50 | -12,00% | 1,62 | 33,34 | 29,34 | -4,00 | -12,00% | 92,00  | 84,00  | -8,00  | -8,70%  |
| F | 25,00 | 85,30  | 75,90  | -9,40  | -11,02% | 1,66 | 30,96 | 27,54 | -3,41 | -11,02% | 105,00 | 96,00  | -9,00  | -8,57%  |
| F | 35,00 | 65,90  | 58,80  | -7,10  | -10,77% | 1,84 | 19,46 | 17,37 | -2,10 | -10,77% | 95,00  | 88,00  | -7,00  | -7,37%  |
| F | 41,00 | 122,50 | 115,90 | -6,60  | -5,39%  | 1,83 | 36,58 | 34,61 | -1,97 | -5,39%  | 114,00 | 109,00 | -5,00  | -4,39%  |
| F | 35,00 | 72,70  | 66,20  | -6,50  | -8,94%  | 1,67 | 26,07 | 23,74 | -2,33 | -8,94%  | 87,00  | 81,00  | -6,00  | -6,90%  |
| F | 52,00 | 116,10 | 105,80 | -10,30 | -8,87%  | 1,72 | 39,24 | 35,76 | -3,48 | -8,87%  | 120,00 | 112,00 | -8,00  | -6,67%  |
| F | 46,00 | 103,20 | 97,60  | -5,60  | -5,43%  | 1,70 | 35,71 | 33,77 | -1,94 | -5,43%  | 107,00 | 100,00 | -7,00  | -6,54%  |
| F | 33,00 | 91,20  | 83,10  | -8,10  | -8,88%  | 1,65 | 33,50 | 30,52 | -2,98 | -8,88%  | 99,00  | 90,00  | -9,00  | -9,09%  |
| F | 42,00 | 135,50 | 128,20 | -7,30  | -5,39%  | 1,68 | 48,01 | 45,42 | -2,59 | -5,39%  | 118,00 | 111,00 | -7,00  | -5,93%  |
| F | 59,00 | 129,90 | 121,70 | -8,20  | -6,31%  | 1,70 | 44,95 | 42,11 | -2,84 | -6,31%  | 127,00 | 118,00 | -9,00  | -7,09%  |
| F | 51,00 | 77,80  | 71,10  | -6,70  | -8,61%  | 1,62 | 29,64 | 27,09 | -2,55 | -8,61%  | 97,00  | 85,00  | -12,00 | -12,37% |
| F | 22,00 | 85,50  | 78,40  | -7,10  | -8,30%  | 1,61 | 32,98 | 30,25 | -2,74 | -8,30%  | 90,00  | 84,00  | -6,00  | -6,67%  |
| F | 43,00 | 107,20 | 101,50 | -5,70  | -5,32%  | 1,67 | 38,44 | 36,39 | -2,04 | -5,32%  | 112,00 | 106,00 | -6,00  | -5,36%  |
| F | 39,00 | 114,10 | 104,80 | -9,30  | -8,15%  | 1,69 | 39,95 | 36,69 | -3,26 | -8,15%  | 103,00 | 95,50  | -7,50  | -7,28%  |
| F | 48,00 | 89,90  | 87,20  | -2,70  | -3,00%  | 1,73 | 30,04 | 29,14 | -0,90 | -3,00%  | 113,00 | 105,00 | -8,00  | -7,08%  |

|   |       |        |        |        |         |      |       |       |       |         |        |        |        |        |
|---|-------|--------|--------|--------|---------|------|-------|-------|-------|---------|--------|--------|--------|--------|
| F | 24,00 | 84,10  | 76,30  | -7,80  | -9,27%  | 1,74 | 27,78 | 25,20 | -2,58 | -9,27%  | 105,00 | 96,00  | -9,00  | -8,57% |
| F | 27,00 | 90,20  | 84,90  | -5,30  | -5,88%  | 1,59 | 35,68 | 33,58 | -2,10 | -5,88%  | 97,00  | 93,00  | -4,00  | -4,12% |
| F | 38,00 | 102,50 | 91,90  | -10,60 | -10,34% | 1,67 | 36,75 | 32,95 | -3,80 | -10,34% | 105,00 | 97,50  | -7,50  | -7,14% |
| F | 33,00 | 92,60  | 82,50  | -10,10 | -10,91% | 1,89 | 25,92 | 23,10 | -2,83 | -10,91% | 115,00 | 108,00 | -7,00  | -6,09% |
| F | 26,00 | 91,30  | 85,40  | -5,90  | -6,46%  | 1,68 | 32,35 | 30,26 | -2,09 | -6,46%  | 95,00  | 90,00  | -5,00  | -5,26% |
| F | 39,00 | 85,30  | 78,80  | -6,50  | -7,62%  | 1,52 | 36,92 | 34,11 | -2,81 | -7,62%  | 105,00 | 99,00  | -6,00  | -5,71% |
| F | 36,00 | 125,50 | 119,50 | -6,00  | -4,78%  | 1,79 | 39,17 | 37,30 | -1,87 | -4,78%  | 123,00 | 119,00 | -4,00  | -3,25% |
| F | 43,00 | 107,90 | 100,80 | -7,10  | -6,58%  | 1,75 | 35,23 | 32,91 | -2,32 | -6,58%  | 117,00 | 113,00 | -4,00  | -3,42% |
| F | 52,00 | 117,10 | 112,60 | -4,50  | -3,84%  | 1,78 | 36,96 | 35,54 | -1,42 | -3,84%  | 117,00 | 113,00 | -4,00  | -3,42% |
| F | 34,00 | 85,20  | 74,90  | -10,30 | -12,09% | 1,65 | 31,29 | 27,51 | -3,78 | -12,09% | 96,00  | 94,00  | -2,00  | -2,08% |
| M | 28,00 | 97,00  | 92,00  | -5,00  | -5,15%  | 1,89 | 27,15 | 25,76 | -1,39 | -5,12%  | 96,00  | 93,00  | -3,00  | -3,13% |
| M | 16,00 | 87,20  | 78,90  | -8,30  | -9,52%  | 1,73 | 29,14 | 26,36 | -2,78 | -9,54%  | 94,00  | 88,00  | -6,00  | -6,38% |
| M | 38,00 | 96,50  | 88,60  | -7,90  | -8,19%  | 1,65 | 35,45 | 32,54 | -2,91 | -8,21%  | 109,00 | 102,00 | -7,00  | -6,42% |
| M | 30,00 | 170,00 | 151,50 | -18,50 | -10,88% | 1,62 | 64,78 | 57,73 | -7,05 | -10,88% | 145,00 | 138,00 | -7,00  | -4,83% |
| M | 34,00 | 114,20 | 103,70 | -10,50 | -9,19%  | 1,72 | 38,60 | 35,05 | -3,55 | -9,20%  | 122,00 | 117,00 | -5,00  | -4,10% |
| M | 30,00 | 88,60  | 79,20  | -9,40  | -10,61% | 1,78 | 27,96 | 25,00 | -2,96 | -10,59% | 109,00 | 99,00  | -10,00 | -9,17% |

|   |           |        |        |        |         |      |       |       |       |         |        |        |        |         |
|---|-----------|--------|--------|--------|---------|------|-------|-------|-------|---------|--------|--------|--------|---------|
| M | 34,0<br>0 | 105,00 | 96,30  | -8,70  | -8,29%  | 1,84 | 31,01 | 28,44 | -2,57 | -8,29%  | 116,00 | 107,00 | -9,00  | -7,76%  |
| M | 49,0<br>0 | 123,20 | 114,90 | -8,30  | -6,74%  | 1,80 | 38,02 | 35,46 | -2,56 | -6,73%  | 126,00 | 124,00 | -2,00  | -1,59%  |
| M | 27,0<br>0 | 106,70 | 98,40  | -8,30  | -7,78%  | 1,80 | 32,93 | 30,37 | -2,56 | -7,77%  | 109,00 | 103,00 | -6,00  | -5,50%  |
| M | 46,0<br>0 | 100,90 | 93,70  | -7,20  | -7,14%  | 1,78 | 31,85 | 29,57 | -2,28 | -7,16%  | 114,00 | 108,00 | -6,00  | -5,26%  |
| M | 33,0<br>0 | 80,90  | 70,30  | -10,60 | -13,10% | 1,73 | 27,03 | 23,49 | -3,54 | -13,10% | 95,00  | 82,00  | -13,00 | -13,68% |
| M | 33,0<br>0 | 113,90 | 104,50 | -9,40  | -8,25%  | 1,75 | 37,19 | 34,12 | -3,07 | -8,25%  | 114,00 | 109,00 | -5,00  | -4,39%  |
| M | 40,0<br>0 | 123,00 | 114,20 | -8,80  | -7,15%  | 1,78 | 38,82 | 36,04 | -2,78 | -7,16%  | 120,00 | 113,00 | -7,00  | -5,83%  |
| M | 30,0<br>0 | 73,10  | 67,00  | -6,10  | -8,34%  | 1,60 | 28,55 | 26,17 | -2,38 | -8,34%  | 87,00  | 82,00  | -5,00  | -5,75%  |
| M | 44,0<br>0 | 115,80 | 107,00 | -8,80  | -7,60%  | 1,87 | 33,12 | 30,60 | -2,52 | -7,61%  | 113,00 | 104,00 | -9,00  | -7,96%  |
| M | 51,0<br>0 | 112,00 | 105,20 | -6,80  | -6,07%  | 1,79 | 34,96 | 32,83 | -2,13 | -6,09%  | 118,00 | 110,00 | -8,00  | -6,78%  |
| M | 36,0<br>0 | 77,00  | 70,80  | -6,20  | -8,05%  | 1,68 | 27,28 | 25,09 | -2,19 | -8,03%  | 100,00 | 94,00  | -6,00  | -6,00%  |
| M | 28,0<br>0 | 108,20 | 101,10 | -7,10  | -6,56%  | 1,75 | 35,33 | 33,01 | -2,32 | -6,57%  | 117,00 | 107,00 | -10,00 | -8,55%  |
| M | 35,0<br>0 | 102,10 | 96,00  | -6,10  | -5,97%  | 1,76 | 32,96 | 30,99 | -1,97 | -5,98%  | 104,00 | 99,00  | -5,00  | -4,81%  |
| M | 42,0<br>0 | 121,10 | 106,50 | -14,60 | -12,06% | 1,80 | 37,38 | 32,87 | -4,51 | -12,07% | 133,00 | 122,00 | -11,00 | -8,27%  |
| M | 26,0<br>0 | 146,90 | 138,20 | -8,70  | -5,92%  | 1,82 | 44,35 | 41,72 | -2,63 | -5,93%  | 127,00 | 122,00 | -5,00  | -3,94%  |
| M | 31,0<br>0 | 136,80 | 128,70 | -8,10  | -5,92%  | 1,96 | 35,61 | 33,50 | -2,11 | -5,93%  | 127,00 | 118,00 | -9,00  | -7,09%  |

|   |       |        |        |        |         |      |       |       |       |         |        |        |        |         |
|---|-------|--------|--------|--------|---------|------|-------|-------|-------|---------|--------|--------|--------|---------|
| M | 18,00 | 130,50 | 121,90 | -8,60  | -6,59%  | 1,86 | 37,72 | 35,24 | -2,48 | -6,57%  | 121,00 | 116,00 | -5,00  | -4,13%  |
| M | 34,00 | 91,60  | 85,90  | -5,70  | -6,22%  | 1,77 | 29,24 | 27,42 | -1,82 | -6,22%  | 101,00 | 94,00  | -7,00  | -6,93%  |
| M | 35,00 | 127,00 | 112,30 | -14,70 | -11,57% | 1,89 | 35,55 | 31,44 | -4,11 | -11,56% | 122,00 | 101,00 | -21,00 | -17,21% |
| M | 58,00 | 118,10 | 101,40 | -16,70 | -14,14% | 1,75 | 38,56 | 33,11 | -5,45 | -14,13% | 136,00 | 117,00 | -19,00 | -13,97% |
| M | 35,00 | 98,30  | 80,40  | -17,90 | -18,21% | 1,72 | 33,23 | 27,18 | -6,05 | -18,21% | 112,00 | 94,00  | -18,00 | -16,07% |
| M | 29,00 | 100,80 | 90,30  | -10,50 | -10,42% | 1,80 | 31,11 | 27,87 | -3,24 | -10,41% | 104,00 | 96,50  | -7,50  | -7,21%  |
| M | 51,00 | 140,00 | 131,00 | -9,00  | -6,43%  | 1,80 | 43,21 | 40,43 | -2,78 | -6,43%  | 140,00 | 131,00 | -9,00  | -6,43%  |
| M | 40,00 | 137,30 | 124,40 | -12,90 | -9,40%  | 1,80 | 42,38 | 38,40 | -3,98 | -9,39%  | 136,00 | 127,00 | -9,00  | -6,62%  |
| M | 30,00 | 180,10 | 166,00 | -14,10 | -7,83%  | 1,78 | 56,84 | 52,39 | -4,45 | -7,83%  | 158,00 | 153,00 | -5,00  | -3,16%  |
| M | 31,00 | 91,40  | 83,00  | -8,40  | -9,19%  | 1,77 | 29,17 | 26,49 | -2,68 | -9,19%  | 97,00  | 89,00  | -8,00  | -8,25%  |
| M | 45,00 | 128,00 | 117,00 | -11,00 | -8,59%  | 1,79 | 39,95 | 36,52 | -3,43 | -8,59%  | 133,00 | 122,00 | -11,00 | -8,27%  |
| M | 26,00 | 78,30  | 71,00  | -7,30  | -9,32%  | 1,74 | 25,86 | 23,45 | -2,41 | -9,32%  | 101,00 | 93,00  | -8,00  | -7,92%  |
| M | 27,00 | 92,40  | 83,90  | -8,50  | -9,20%  | 1,77 | 29,49 | 26,78 | -2,71 | -9,19%  | 106,00 | 94,00  | -12,00 | -11,32% |
| M | 54,00 | 78,00  | 71,40  | -6,60  | -8,46%  | 1,75 | 25,47 | 23,31 | -2,16 | -8,48%  | 101,00 | 92,00  | -9,00  | -8,91%  |
| M | 41,00 | 134,00 | 121,30 | -12,70 | -9,48%  | 1,91 | 36,73 | 33,25 | -3,48 | -9,47%  | 129,00 | 119,00 | -10,00 | -7,75%  |
| M | 31,00 | 89,40  | 80,60  | -8,80  | -9,84%  | 1,74 | 29,53 | 26,62 | -2,91 | -9,85%  | 102,00 | 94,00  | -8,00  | -7,84%  |

|   |       |        |        |        |         |      |       |       |       |         |        |        |        |        |
|---|-------|--------|--------|--------|---------|------|-------|-------|-------|---------|--------|--------|--------|--------|
| M | 32,00 | 96,70  | 90,75  | -5,95  | -6,15%  | 1,75 | 31,58 | 29,63 | -1,95 | -6,17%  | 111,00 | 104,50 | -6,50  | -5,86% |
| M | 30,00 | 88,00  | 77,90  | -10,10 | -11,48% | 1,74 | 29,07 | 25,73 | -3,34 | -11,49% | 110,00 | 100,00 | -10,00 | -9,09% |
| M | 35,00 | 87,20  | 78,50  | -8,70  | -9,98%  | 1,75 | 28,47 | 25,63 | -2,84 | -9,98%  | 100,00 | 98,00  | -2,00  | -2,00% |
| M | 37,00 | 99,80  | 93,10  | -6,70  | -6,71%  | 1,70 | 34,53 | 32,21 | -2,32 | -6,72%  | 111,00 | 105,00 | -6,00  | -5,41% |
| M | 20,00 | 119,70 | 114,80 | -4,90  | -4,09%  | 1,73 | 39,99 | 38,36 | -1,63 | -4,08%  | 125,00 | 117,00 | -8,00  | -6,40% |
| M | 49,00 | 90,90  | 83,70  | -7,20  | -7,92%  | 1,55 | 37,84 | 34,84 | -3,00 | -7,93%  | 105,00 | 96,00  | -9,00  | -8,57% |
| M | 41,00 | 92,40  | 85,40  | -7,00  | -7,58%  | 1,58 | 37,01 | 34,21 | -2,80 | -7,57%  | 111,00 | 105,00 | -6,00  | -5,41% |
| M | 37,00 | 121,70 | 113,30 | -8,40  | -6,90%  | 1,77 | 38,85 | 36,16 | -2,69 | -6,92%  | 121,00 | 117,00 | -4,00  | -3,31% |
| M | 27,00 | 108,30 | 98,30  | -10,00 | -9,23%  | 1,61 | 41,78 | 37,92 | -3,86 | -9,24%  | 129,00 | 120,00 | -9,00  | -6,98% |
| M | 21,00 | 103,70 | 93,40  | -10,30 | -9,93%  | 1,77 | 33,10 | 29,81 | -3,29 | -9,94%  | 110,00 | 106,00 | -4,00  | -3,64% |
| M | 42,00 | 82,50  | 77,20  | -5,30  | -6,42%  | 1,53 | 35,24 | 32,98 | -2,26 | -6,41%  | 105,00 | 95,00  | -10,00 | -9,52% |
| M | 42,00 | 72,40  | 67,40  | -5,00  | -6,91%  | 1,67 | 25,96 | 24,17 | -1,79 | -6,90%  | 91,00  | 87,00  | -4,00  | -4,40% |
| M | 52,00 | 77,60  | 72,20  | -5,40  | -6,96%  | 1,70 | 26,85 | 24,98 | -1,87 | -6,96%  | 97,00  | 94,20  | -2,80  | -2,89% |
| M | 44,00 | 71,30  | 66,80  | -4,50  | -6,31%  | 1,48 | 32,55 | 30,50 | -2,05 | -6,30%  | 98,00  | 93,00  | -5,00  | -5,10% |
| M | 48,00 | 86,00  | 81,50  | -4,50  | -5,23%  | 1,70 | 29,76 | 28,20 | -1,56 | -5,24%  | 100,00 | 95,00  | -5,00  | -5,00% |
| M | 35,00 | 94,50  | 88,50  | -6,00  | -6,35%  | 1,70 | 32,70 | 30,62 | -2,08 | -6,36%  | 105,00 | 105,00 | 0,00   | 0,00%  |

|   |       |        |        |        |         |      |       |       |       |         |        |        |        |         |
|---|-------|--------|--------|--------|---------|------|-------|-------|-------|---------|--------|--------|--------|---------|
| M | 43,00 | 78,20  | 73,50  | -4,70  | -6,01%  | 1,66 | 28,38 | 26,67 | -1,71 | -6,03%  | 99,00  | 93,50  | -5,50  | -5,56%  |
| M | 38,00 | 98,50  | 89,20  | -9,30  | -9,44%  | 1,65 | 36,18 | 32,76 | -3,42 | -9,45%  | 117,50 | 109,00 | -8,50  | -7,23%  |
| M | 38,00 | 108,00 | 97,90  | -10,10 | -9,35%  | 1,73 | 36,09 | 32,71 | -3,38 | -9,37%  | 108,00 | 102,00 | -6,00  | -5,56%  |
| M | 57,00 | 76,30  | 70,20  | -6,10  | -7,99%  | 1,59 | 30,18 | 27,77 | -2,41 | -7,99%  | 104,00 | 95,00  | -9,00  | -8,65%  |
| M | 41,00 | 88,00  | 83,00  | -5,00  | -5,68%  | 1,56 | 36,16 | 34,11 | -2,05 | -5,67%  | 95,00  | 92,00  | -3,00  | -3,16%  |
| M | 26,00 | 96,60  | 91,00  | -5,60  | -5,80%  | 1,74 | 31,91 | 30,06 | -1,85 | -5,80%  | 103,00 | 96,00  | -7,00  | -6,80%  |
| M | 43,00 | 83,80  | 77,70  | -6,10  | -7,28%  | 1,70 | 29,00 | 26,89 | -2,11 | -7,28%  | 104,00 | 97,00  | -7,00  | -6,73%  |
| M | 49,00 | 88,80  | 84,20  | -4,60  | -5,18%  | 1,72 | 30,02 | 28,46 | -1,55 | -5,18%  | 112,00 | 106,00 | -6,00  | -5,36%  |
| M | 47,00 | 74,50  | 66,30  | -8,20  | -11,01% | 1,68 | 26,40 | 23,49 | -2,91 | -11,02% | 97,00  | 88,00  | -9,00  | -9,28%  |
| M | 46,00 | 117,50 | 108,00 | -9,50  | -8,09%  | 1,77 | 37,51 | 34,47 | -3,04 | -8,10%  | 124,00 | 120,00 | -4,00  | -3,23%  |
| M | 46,00 | 79,00  | 74,50  | -4,50  | -5,70%  | 1,59 | 31,25 | 29,47 | -1,78 | -5,70%  | 97,00  | 95,00  | -2,00  | -2,06%  |
| M | 39,00 | 97,60  | 88,50  | -9,10  | -9,32%  | 1,51 | 42,81 | 38,81 | -4,00 | -9,34%  | 115,00 | 103,00 | -12,00 | -10,43% |
| M | 24,00 | 115,50 | 105,80 | -9,70  | -8,40%  | 1,78 | 36,45 | 33,39 | -3,06 | -8,40%  | 117,00 | 111,00 | -6,00  | -5,13%  |
| M | 38,00 | 87,20  | 82,00  | -5,20  | -5,96%  | 1,77 | 27,83 | 26,17 | -1,66 | -5,96%  | 99,00  | 93,00  | -6,00  | -6,06%  |
| M | 27,00 | 99,00  | 89,10  | -9,90  | -10,00% | 1,65 | 36,36 | 32,73 | -3,63 | -9,98%  | 105,00 | 98,00  | -7,00  | -6,67%  |
| M | 25,00 | 88,30  | 81,30  | -7,00  | -7,93%  | 1,68 | 31,29 | 28,81 | -2,48 | -7,93%  | 92,00  | 87,00  | -5,00  | -5,43%  |

|   |       |        |        |        |         |      |       |       |       |         |        |        |        |         |
|---|-------|--------|--------|--------|---------|------|-------|-------|-------|---------|--------|--------|--------|---------|
| M | 67,00 | 56,90  | 51,50  | -5,40  | -9,49%  | 1,58 | 22,79 | 20,63 | -2,16 | -9,48%  | 86,00  | 82,00  | -4,00  | -4,65%  |
| M | 41,00 | 97,30  | 90,90  | -6,40  | -6,58%  | 1,78 | 30,71 | 28,69 | -2,02 | -6,58%  | 108,00 | 103,00 | -5,00  | -4,63%  |
| M | 33,00 | 105,60 | 95,10  | -10,50 | -9,94%  | 1,90 | 29,25 | 26,34 | -2,91 | -9,95%  | 117,00 | 113,00 | -4,00  | -3,42%  |
| M | 64,00 | 66,80  | 61,60  | -5,20  | -7,78%  | 1,52 | 28,91 | 26,66 | -2,25 | -7,78%  | 93,00  | 80,00  | -13,00 | -13,98% |
| M | 37,00 | 77,80  | 68,40  | -9,40  | -12,08% | 1,68 | 27,57 | 24,23 | -3,34 | -12,11% | 96,00  | 85,00  | -11,00 | -11,46% |
| M | 39,00 | 76,50  | 70,40  | -6,10  | -7,97%  | 1,62 | 29,15 | 26,83 | -2,32 | -7,96%  | 87,00  | 82,00  | -5,00  | -5,75%  |
| M | 24,00 | 93,90  | 86,60  | -7,30  | -7,77%  | 1,65 | 34,49 | 31,81 | -2,68 | -7,77%  | 100,00 | 97,00  | -3,00  | -3,00%  |
| M | 23,00 | 95,40  | 88,50  | -6,90  | -7,23%  | 1,80 | 29,44 | 27,31 | -2,13 | -7,24%  | 108,00 | 93,00  | -15,00 | -13,89% |
| M | 52,00 | 91,50  | 84,00  | -7,50  | -8,20%  | 1,53 | 39,09 | 35,88 | -3,21 | -8,21%  | 107,00 | 96,00  | -11,00 | -10,28% |
| M | 38,00 | 75,70  | 70,00  | -5,70  | -7,53%  | 1,60 | 29,57 | 27,34 | -2,23 | -7,54%  | 98,00  | 94,00  | -4,00  | -4,08%  |
| M | 67,00 | 56,90  | 51,50  | -5,40  | -9,49%  | 1,62 | 21,68 | 19,62 | -2,06 | -9,50%  | 86,00  | 82,00  | -4,00  | -4,65%  |
| M | 41,00 | 98,30  | 91,90  | -6,40  | -6,51%  | 1,75 | 31,77 | 29,68 | -2,09 | -6,58%  | 118,00 | 113,00 | -5,00  | -4,24%  |
| M | 33,00 | 125,60 | 115,10 | -10,50 | -8,36%  | 1,80 | 32,59 | 29,35 | -3,24 | -9,94%  | 127,00 | 123,00 | -4,00  | -3,15%  |
| M | 30,00 | 94,90  | 85,60  | -9,30  | -9,80%  | 1,82 | 28,65 | 25,84 | -2,81 | -9,81%  | 104,00 | 94,00  | -10,00 | -9,62%  |
| M | 36,00 | 78,90  | 72,70  | -6,20  | -7,86%  | 1,61 | 30,44 | 28,05 | -2,39 | -7,86%  | 88,00  | 82,00  | -6,00  | -6,82%  |
| M | 33,00 | 88,00  | 81,90  | -6,10  | -6,93%  | 1,67 | 31,55 | 29,37 | -2,19 | -6,93%  | 94,00  | 90,00  | -4,00  | -4,26%  |

|   |       |        |        |        |         |      |       |       |       |         |        |        |        |         |
|---|-------|--------|--------|--------|---------|------|-------|-------|-------|---------|--------|--------|--------|---------|
| M | 39,00 | 121,30 | 114,20 | -7,10  | -5,85%  | 1,58 | 44,58 | 41,74 | -2,84 | -6,38%  | 124,00 | 116,00 | -8,00  | -6,45%  |
| M | 34,00 | 96,20  | 88,20  | -8,00  | -8,32%  | 1,70 | 32,94 | 30,17 | -2,77 | -8,40%  | 106,00 | 99,00  | -7,00  | -6,60%  |
| M | 36,00 | 93,60  | 85,30  | -8,30  | -8,87%  | 1,56 | 38,46 | 35,05 | -3,41 | -8,87%  | 98,00  | 91,00  | -7,00  | -7,14%  |
| M | 35,00 | 114,30 | 101,90 | -12,40 | -10,85% | 1,88 | 32,34 | 28,83 | -3,51 | -10,85% | 125,00 | 111,00 | -14,00 | -11,20% |
| M | 41,00 | 130,50 | 124,50 | -6,00  | -4,60%  | 1,74 | 43,10 | 41,12 | -1,98 | -4,60%  | 129,00 | 125,00 | -4,00  | -3,10%  |
| M | 28,00 | 70,50  | 62,60  | -7,90  | -11,21% | 1,63 | 26,53 | 23,56 | -2,97 | -11,21% | 78,00  | 70,00  | -8,00  | -10,26% |
| M | 30,00 | 83,40  | 77,80  | -5,60  | -6,71%  | 1,72 | 27,85 | 25,96 | -1,89 | -6,80%  | 98,00  | 91,00  | -7,00  | -7,14%  |
| M | 43,00 | 77,60  | 71,40  | -6,20  | -7,99%  | 1,64 | 28,85 | 26,55 | -2,31 | -7,99%  | 78,00  | 75,00  | -3,00  | -3,85%  |

|                                                                 |        |
|-----------------------------------------------------------------|--------|
| Mean of weight reduction<br>after 5 weeks of 4 Phases<br>Method | -8.23% |
|-----------------------------------------------------------------|--------|

|                                                                              |        |
|------------------------------------------------------------------------------|--------|
| Mean of waist circumference<br>reduction after 5 weeks of 4<br>Phases Method | -7.11% |
|------------------------------------------------------------------------------|--------|

|                                                              |        |
|--------------------------------------------------------------|--------|
| Mean of BMI reduction<br>after 5 weeks of 4 Phases<br>Method | -8.24% |
|--------------------------------------------------------------|--------|
